# Supplementary material
Source: PubMed Central journal article supplement (PMC2831297)

Supplement

Wheezing and bronchial hyperresponsiveness in the preschool years as predictors of newly diagnosed asthma in early adult life: a longitudinal birth cohort study

Debra A. Stern, Wayne J. Morgan, Marilyn Halonen, Anne L. Wright, and Fernando D. Martinez

Supplement Table 1. Proportion (%) of subjects in different categories for early life risk factors and smoking at age 22 who had active asthma, wheeze and shortness of breath with wheeze at age 22 years

| Risk Factors                   | Categories | Age 22 Years |                |                    |                |                       |                |            |                |                                  |                |                    |                |
|--------------------------------|------------|--------------|----------------|--------------------|----------------|-----------------------|----------------|------------|----------------|----------------------------------|----------------|--------------------|----------------|
|                                |            | Total<br>n   | Neither<br>(n) | Asthma and Wheeze* |                |                       |                | total<br>n | Neither<br>(n) | Shortness of Breath with Wheeze* |                |                    |                |
|                                |            |              |                | Asthma<br>% (n+)   | p <sup>†</sup> | Wheeze Only<br>% (n+) | p <sup>†</sup> |            |                | Infrequent<br>% (n+)             | p <sup>†</sup> | Frequent<br>% (n+) | p <sup>†</sup> |
| Sex                            | Male       | 404          | (240)          | 26.6 (87)          |                | 24.3 (77)             |                | 403        | (328)          | 12.1 (45)                        |                | 8.4 (30)           |                |
|                                | Female     | 445          | (265)          | 26.2 (94)          | 0.9            | 24.5 (86)             | 0.9            | 447        | (359)          | 13.7 (57)                        | 0.4            | 7.9 (31)           | 0.8            |
| Parental asthma                | Neither    | 622          | (407)          | 20.2 (103)         |                | 21.6 (112)            |                | 622        | (523)          | 10.4 (61)                        |                | 6.8 (38)           |                |
|                                | Either     | 179          | (70)           | 48.5 (66)          | <0.0001        | 38.1 (43)             | 0.003          | 179        | (125)          | 21.4 (34)                        | 0.0003         | 13.8 (20)          | 0.007          |
| Parental smoking               | No         | 565          | (346)          | 25.1 (116)         |                | 22.9 (103)            |                | 566        | (461)          | 12.9 (68)                        |                | 7.4 (37)           |                |
|                                | Yes        | 273          | (153)          | 28.5 (61)          | 0.4            | 27.8 (59)             | 0.2            | 273        | (216)          | 13.3 (33)                        | 0.9            | 10.0 (24)          | 0.2            |
| Eczema 2yr                     | No         | 696          | (411)          | 25.7 (143)         |                | 25.1 (139)            |                | 695        | (571)          | 11.6 (75)                        |                | 7.9 (49)           |                |
|                                | Yes        | 79           | (48)           | 32.4 (23)          | 0.2            | 14.3 (8)              | 0.076          | 79         | (61)           | 16.4 (12)                        | 0.2            | 9.0 (6)            | 0.7            |
| Early Wheezing Phenotypes      | Never      | 354          | (241)          | 13.6 (38)          | ref            | 23.7 (75)             | ref            | 353        | (308)          | 8.6 (29)                         | ref            | 4.9 (16)           | ref            |
|                                | Transient  | 135          | (84)           | 22.9 (25)          | 0.027          | 23.6 (26)             | 0.9            | 135        | (115)          | 9.4 (12)                         | 0.8            | 6.5 (8)            | 0.5            |
|                                | Late Onset | 107          | (52)           | 44.7 (42)          | <0.0001        | 20.0 (13)             | 0.5            | 107        | (78)           | 18.8 (18)                        | 0.006          | 12.4 (11)          | 0.015          |
|                                | Persistent | 86           | (34)           | 55.3 (42)          | <0.0001        | 22.7 (10)             | 0.9            | 86         | (55)           | 24.7 (18)                        | 0.0002         | 19.1 (13)          | 0.0002         |
| <i>Alternaria</i> positive 6yr | No         | 546          | (346)          | 22.4 (100)         |                | 22.4 (100)            |                | 545        | (453)          | 12.0 (62)                        |                | 6.2 (30)           |                |
|                                | Yes        | 113          | (48)           | 49.5 (47)          | <0.0001        | 27.3 (18)             | 0.4            | 113        | (77)           | 18.9 (18)                        | 0.069          | 18.9 (18)          | <0.0001        |
| CA-BHR 6yr                     | No         | 330          | (217)          | 16.5 (43)          |                | 24.4 (70)             |                | 329        | (284)          | 9.8 (31)                         |                | 4.7 (14)           |                |
|                                | Yes        | 58           | (25)           | 46.8 (22)          | <0.0001        | 30.6 (11)             | 0.4            | 58         | (40)           | 21.6 (11)                        | 0.018          | 14.9 (7)           | 0.010          |
| V'maxFRC Quartiles 6yr         | High       | 132          | (91)           | 15.0 (16)          | ref            | 21.6 (25)             | ref            | 132        | (111)          | 11.2 (14)                        | ref            | 5.1 (6)            | ref            |
|                                | Med-high   | 132          | (76)           | 26.9 (28)          | 0.005          | 26.9 (28)             | 0.3            | 132        | (111)          | 9.0 (11)                         | 0.6            | 8.3 (10)           | 0.3            |
|                                | Med-low    | 132          | (84)           | 22.9 (25)          | 0.031          | 21.5 (23)             | 0.8            | 132        | (110)          | 14.1 (18)                        | 0.5            | 3.5 (4)            | 0.5            |
|                                | Low        | 132          | (63)           | 41.1 (44)          | <0.0001        | 28.4 (25)             | 0.3            | 131        | (95)           | 17.4 (20)                        | 0.17           | 15.2 (17)          | 0.016          |
| Smoking 22yr                   | No         | 625          | (409)          | 23.3 (124)         |                | 18.4 (92)             |                | 627        | (517)          | 12.1 (71)                        |                | 7.0 (39)           |                |
|                                | Yes        | 224          | (96)           | 37.3 (57)          | 0.0006         | 42.5 (71)             | <0.0001        | 223        | (170)          | 15.4 (31)                        | 0.2            | 11.5 (22)          | 0.055          |

\* Percentages for each symptom group were calculated with respect to the symptom-negative group after excluding the other symptom group.

<sup>†</sup> p-values for the association between each risk factor and the symptom groups were estimated using multinomial logistic regression with the symptom-negative group as the reference group.

Supplement Table 2. Multinomial odds ratios for respiratory symptoms at age 22 years by different risk factors in early life

| Risk Factors *            | Categories | Age 22 Years                 |         |                 |         |                                 |       |                 |       |
|---------------------------|------------|------------------------------|---------|-----------------|---------|---------------------------------|-------|-----------------|-------|
|                           |            | Asthma and Wheeze            |         |                 |         | Shortness of Breath with Wheeze |       |                 |       |
|                           |            | Diagnosed Asthma             |         | Wheeze Only     |         | Infrequent                      |       | Frequent        |       |
|                           |            | M-OR <sup>†</sup><br>(95%CI) | p       | M-OR<br>(95%CI) | p       | M-OR<br>(95%CI)                 | p     | M-OR<br>(95%CI) | p     |
| Parental asthma           | Yes        | 3.3 (2.2, 5.2)               | <0.0001 | 2.1 (1.3, 3.3)  | 0.001   | 2.1 (1.3, 3.4)                  | 0.002 | 2.0 (1.1, 3.6)  | 0.031 |
| Eczema 2yr                | Yes        | 1.0 (0.5, 1.9)               | 0.9     | 0.5 (0.2, 1.0)  | 0.052   | -                               | -     | -               | -     |
| Early Wheezing Phenotypes | Never      | ref                          |         | ref             |         | ref                             |       | ref             |       |
|                           | Transient  | 1.5 (0.8, 2.7)               | 0.2     | 0.9 (0.5, 1.6)  | 0.8     | 1.0 (0.5, 2.0)                  | 0.9   | 1.0 (0.4, 2.5)  | 0.9   |
|                           | Late Onset | 4.6 (2.6, 8.3)               | <0.0001 | 0.8 (0.4, 1.6)  | 0.5     | 2.2 (1.1, 4.3)                  | 0.018 | 2.1 (0.9, 5.0)  | 0.081 |
|                           | Persistent | 6.5 (3.5, 12)                | <0.0001 | 0.9 (0.4, 2.0)  | 0.8     | 3.0 (1.5, 6.0)                  | 0.002 | 3.2 (1.4, 7.4)  | 0.008 |
| <i>Alternaria</i> pos 6yr | Yes        | 2.4 (1.4, 4.1)               | 0.001   | 1.3 (0.7, 2.5)  | 0.3     | 1.3 (0.7, 2.4)                  | 0.4   | 2.5 (1.3, 5.0)  | 0.007 |
| CA-BHR 6yr                | Yes        | 4.7 (2.2, 10)                | 0.001   | 1.5 (0.7, 3.3)  | 0.3     | 2.3 (1.1, 5.3)                  | 0.030 | 3.1 (1.1, 8.8)  | 0.029 |
| V'maxFRC 6yr              | Low        | 2.3 (1.3, 4.0)               | 0.003   | 1.5 (0.8, 2.6)  | 0.2     | 1.5 (0.8, 2.7)                  | 0.2   | 2.5 (1.2, 5.3)  | 0.015 |
| Smoking 22yr              | Yes        | 2.1 (1.4, 3.2)               | 0.001   | 3.3 (2.3, 5.0)  | <0.0001 | 1.3 (0.8, 2.1)                  | 0.3   | 1.8 (1.0, 3.3)  | 0.039 |

\* Variables with p-values less than 0.1 in full models were retained for the best-fitting models

† M-OR multinomial odds ratio (estimated using multinomial logistic regression) with all risk factors listed in the table included in the model with the respective symptom-negative group as the reference group. Models were additionally adjusted for ethnicity and sex.

Supplement Table 3. Prevalence of respiratory symptoms and allergy skin test responses for asthma at age 22 years

| Asthma Groups   | Age 22 Years    |        |         |       |         |         |                    |         |       |                     |        |         |
|-----------------|-----------------|--------|---------|-------|---------|---------|--------------------|---------|-------|---------------------|--------|---------|
|                 | SOB with Wheeze |        |         | Cough |         |         | Skin Test Positive |         |       | Alternaria Positive |        |         |
|                 | %               | n+/n   | p*      | %     | n+/n    | p*      | %                  | n+/n    | p*    | %                   | n+/n   | p*      |
| No Asthma       | 8.8             | 52/593 | ref     | 29.3  | 169/577 | ref     | 76.6               | 255/333 | ref   | 28.2                | 94/333 | ref     |
| Inactive        | 6.8             | 5/74   | 0.6     | 26.0  | 19/73   | 0.6     | 93.9               | 46/49   | 0.011 | 51.0                | 25/49  | 0.002   |
| Newly Diagnosed | 55.1            | 27/49  | <0.0001 | 71.4  | 35/49   | <0.0001 | 95.8               | 23/24   | 0.058 | 41.7                | 10/24  | 0.17    |
| Chronic         | 59.1            | 78/132 | <0.0001 | 48.4  | 61/126  | <0.0001 | 91.3               | 63/69   | 0.009 | 55.1                | 38/69  | <0.0001 |

\* p-values computed using logistic regression with the *no asthma* group as the reference group

Supplement Table 4. Prevalence of respiratory symptoms and allergy skin test responses for asthma at age 22 and by prescription medication use for asthma

| Asthma Groups         | Age 22 Years    |       |         |       |       |       |                    |       |     |                     |       |     |
|-----------------------|-----------------|-------|---------|-------|-------|-------|--------------------|-------|-----|---------------------|-------|-----|
|                       | SOB with Wheeze |       |         | Cough |       |       | Skin Test Positive |       |     | Alternaria Positive |       |     |
|                       | %               | n+/n  | p*      | %     | n+/n  | p*    | %                  | n+/n  | p*  | %                   | n+/n  | p*  |
| Newly Diagnosed       |                 |       |         |       |       |       |                    |       |     |                     |       |     |
| No Meds <sup>†</sup>  | 45.8            | 11/24 |         | 70.8  | 17/24 |       | 92.9               | 13/14 |     | 42.9                | 6/14  |     |
| Yes Meds <sup>†</sup> | 64.0            | 16/25 | 0.3     | 72.0  | 18/25 | 0.9   | 100                | 10/10 | 0.9 | 40.0                | 4/10  | 0.9 |
| Chronic               |                 |       |         |       |       |       |                    |       |     |                     |       |     |
| No Meds <sup>†</sup>  | 40.3            | 25/62 |         | 40.4  | 23/57 |       | 90.6               | 29/32 |     | 50.0                | 16/32 |     |
| Yes Meds <sup>†</sup> | 75.7            | 53/70 | <0.0001 | 55.1  | 38/69 | 0.110 | 91.9               | 34/37 | 0.9 | 59.5                | 22/37 | 0.5 |

\* p-values computed with Fisher's exact test comparing medication use to no medication use for each asthma group

<sup>†</sup> Used any prescription medication for asthma or wheeze during the past year

Supplement Table 5. Pre- and post-bronchodilator FEV<sub>1</sub>/FVC ratio and response to bronchodilator for asthma at age 22 and by prescription medication use for asthma

| Asthma Groups         | Age 22 Years                                    |               |                |                                                  |                |                                       |                |
|-----------------------|-------------------------------------------------|---------------|----------------|--------------------------------------------------|----------------|---------------------------------------|----------------|
|                       | Pre-BD FEV <sub>1</sub> /FVC ratio <sup>*</sup> |               |                | Post-BD FEV <sub>1</sub> /FVC ratio <sup>*</sup> |                | Bronchodilator Response <sup>*†</sup> |                |
|                       | (z-scores)                                      |               |                | (z-scores)                                       |                | (z-scores)                            |                |
|                       | n                                               | mean (sem)    | p <sup>‡</sup> | mean (sem)                                       | p <sup>‡</sup> | mean (sem)                            | p <sup>‡</sup> |
| Newly Diagnosed       |                                                 |               |                |                                                  |                |                                       |                |
| No Meds <sup>§</sup>  | 13                                              | - 0.54 (0.33) |                | - 0.44 (0.22)                                    |                | 0.36 (0.51)                           |                |
| Yes Meds <sup>§</sup> | 11                                              | - 0.42 (0.19) | 0.7            | - 0.52 (0.34)                                    | 0.8            | 0.03 (0.29)                           | 0.6            |
| Chronic               |                                                 |               |                |                                                  |                |                                       |                |
| No Meds <sup>§</sup>  | 35                                              | - 0.03 (0.16) |                | - 0.01 (0.16)                                    |                | - 0.05 (0.15)                         |                |
| Yes Meds <sup>§</sup> | 34                                              | - 0.71 (0.24) | 0.022          | - 0.66 (0.23)                                    | 0.025          | 0.70 (0.26)                           | 0.014          |

<sup>\*</sup> Each lung function outcome was adjusted for sex in a linear regression and the standardized residuals from the regression (z-scores) were saved and used as the outcome measures for this table.

<sup>†</sup> Bronchodilator response calculated using FEV<sub>1</sub> (ml) as ((post-pre)/(post+pre))\*100

<sup>‡</sup> p-values computed with two-sample t-test with unequal variances comparing medication use to no medication use for each asthma group

<sup>§</sup> Used any prescription medication for asthma or wheeze during the past year

Supplement Figure 1. Early wheezing phenotype distribution for asthma at age 22 years. Sample sizes are limited to those with early wheezing phenotype information. For asthma at age 22 years: *inactive asthma* (n=65) is physician diagnosis of asthma between 2 and 16 years but no current symptoms at age 22, *newly diagnosed asthma* (n=35) is first diagnosis and active symptoms at age 22, *chronic asthma* (n=112) is a diagnosis between 2 and 16 years and active symptoms at age 22, and *no asthma* (n=470) is no diagnosis of asthma through age 22 years. For the early wheezing phenotypes: *persistent wheeze* includes children who wheeze during LRI before age 3 and were still wheezing at age 6, *late onset wheeze* includes children who did not have wheezing LRI but started wheezing by age 6, *transient early wheeze* includes children who wheezed with LRI but did not report wheezing at age 6 and *never wheeze* includes children with no wheezing LRIs and no wheeze at age 6.

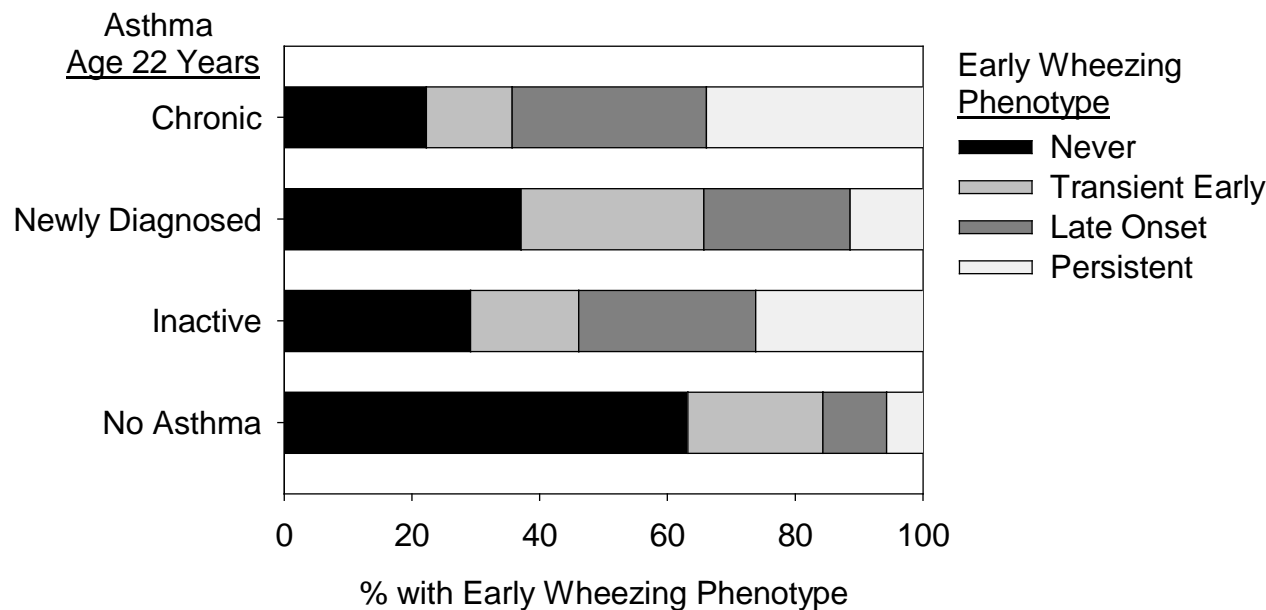

Supplement: NIHMS108873-supplement-1.pdf [file NIHMS108873-supplement-1.pdf]
